# Supplementary material for: Loneliness, Depression, and Genetics in the Elderly: Prognostic Factors of a Worse Health Condition?
Source: MDPI journal article supplement (doi:10.3390/ijerph192315456), 2022-11-22
Supplement: s1 [file s1]

Tabla S1. Comparison of means between depressed individuals and solos groups.

|                                                                                                                                                                                | Groups    | Number | Median | standard deviation | t     | Degrees of freedom | P-value |
|--------------------------------------------------------------------------------------------------------------------------------------------------------------------------------|-----------|--------|--------|--------------------|-------|--------------------|---------|
| Health status                                                                                                                                                                  | Depressed | 64     | 3,64   | 0,72               | -0,77 | 495                | .441    |
|                                                                                                                                                                                | Solos     | 433    | 3,71   | 0,68               | -0,74 | 80,38              |         |
| Circulation problems (excluding varicose veins). intermittent claudication                                                                                                     | Depressed | 66     | 0,18   | 0,39               | 0,35  | 507,00             | 0,365   |
|                                                                                                                                                                                | Solos     | 443    | 0,16   | 0,37               | 0,33  | 83,66              |         |
| Osteoarthritis                                                                                                                                                                 | Depressed | 66     | 0,39   | 0,49               | 0,97  | 508,00             | 0,167   |
|                                                                                                                                                                                | Solos     | 444    | 0,33   | 0,47               | 0,94  | 83,74              |         |
| Arthritis or rheumatism                                                                                                                                                        | Depressed | 66     | 0,17   | 0,38               | 0,38  | 508,00             | 0,352   |
|                                                                                                                                                                                | Solos     | 444    | 0,15   | 0,36               | 0,37  | 83,32              |         |
| Asthma                                                                                                                                                                         | Depressed | 66     | 0,09   | 0,29               | 1,69  | 507,00             | 0,099   |
|                                                                                                                                                                                | Solos     | 443    | 0,04   | 0,20               | 1,30  | 74,78              |         |
| Anxiety                                                                                                                                                                        | Depressed | 66     | 0,33   | 0,48               | 5,92  | 508,00             | <.001   |
|                                                                                                                                                                                | Solos     | 444    | 0,09   | 0,28               | 4,09  | 72,03              |         |
| Osteoporosis                                                                                                                                                                   | Depressed | 66     | 0,09   | 0,29               | -0,58 | 508,00             | 0,283   |
|                                                                                                                                                                                | Solos     | 444    | 0,11   | 0,32               | -0,62 | 90,15              |         |
| Chronic back pain                                                                                                                                                              | Depressed | 66     | 0,24   | 0,43               | 0,97  | 508,00             | 0,167   |
|                                                                                                                                                                                | Solos     | 444    | 0,19   | 0,39               | 0,91  | 81,89              |         |
| Urinary tract problems (prostate. bladder)                                                                                                                                     | Depressed | 66     | 0,06   | 0,24               | -1,10 | 508,00             | 0,097   |
|                                                                                                                                                                                | Solos     | 444    | 0,10   | 0,31               | -1,31 | 99,01              |         |
| During the last 4 weeks. to what extent has any type of pain made it difficult for you to do your usual work (paid work and domestic or care work) or your leisure activities? | Depressed | 66     | 1,70   | 1,14               | 0,02  | 508                | .982    |
|                                                                                                                                                                                | Solos     | 444    | 1,69   | 1,10               | 0,02  | 83,99              |         |
| Headache                                                                                                                                                                       | Depressed | 11     | 1,27   | 2,53               | 0,72  | 94                 | .475    |
|                                                                                                                                                                                | Solos     | 85     | 0,82   | 1,87               | 0,57  | 11,46              |         |
| Feet pain                                                                                                                                                                      | Depressed | 10     | 0,30   | 0,95               | -1,43 | 95                 | .007    |
|                                                                                                                                                                                | Solos     | 87     | 1,49   | 2,61               | -2,91 | 29,08              |         |
| Creatinine (mg/dL)                                                                                                                                                             | Depressed | 62     | 0,78   | 0,14               | -2,66 | 485                | .000    |
|                                                                                                                                                                                | Solos     | 425    | 0,86   | 0,23               | -3,81 | 116,75             |         |
| Monocyte percentage                                                                                                                                                            | Depressed | 45     | 6,99   | 1,22               | -0,87 | 354                | .387    |

|                                                                                         |           |     |       |       |       |        |                 |
|-----------------------------------------------------------------------------------------|-----------|-----|-------|-------|-------|--------|-----------------|
|                                                                                         | Solos     | 311 | 7,14  | 1,12  | -0,81 | 55,27  |                 |
| <b>Age</b>                                                                              | Depressed | 66  | 61,73 | 8,79  | -2,22 | 508    | <b>.016</b>     |
|                                                                                         | Solos     | 444 | 64,64 | 10,09 | -2,46 | 92,43  |                 |
| Level of satisfaction with your life in general                                         | Depressed | 48  | 6,88  | 1,45  | -0,87 | 390    | .383            |
|                                                                                         | Solos     | 344 | 7,04  | 1,17  | -0,74 | 55,84  |                 |
| Level of satisfaction with your state of health                                         | Depressed | 55  | 6,27  | 1,42  | -1,86 | 417    | .064            |
|                                                                                         | Solos     | 364 | 6,66  | 1,43  | -1,87 | 71,56  |                 |
| Level of satisfaction with the achievements you are currently achieving in life         | Depressed | 46  | 6,96  | 1,32  | 0,56  | 402    | .573            |
|                                                                                         | Solos     | 358 | 6,84  | 1,38  | 0,59  | 58,50  |                 |
| Level of satisfaction with personal relationships                                       | Depressed | 32  | 7,31  | 1,36  | -0,05 | 335    | .963            |
|                                                                                         | Solos     | 305 | 7,32  | 0,98  | -0,04 | 34,50  |                 |
| Level of satisfaction with how safe and secure you feel                                 | Depressed | 34  | 7,29  | 0,80  | 0,96  | 357    | .336            |
|                                                                                         | Solos     | 325 | 7,09  | 1,19  | 1,33  | 49,92  |                 |
| Level of satisfaction with their feeling of belonging to a community or group of people | Depressed | 42  | 6,98  | 1,47  | 0,00  | 387    | .997            |
|                                                                                         | Solos     | 347 | 6,98  | 1,34  | 0,00  | 49,60  |                 |
| <b>Number of diseases</b>                                                               | Depressed | 65  | 4,34  | 2,26  | 3,26  | 501,00 | <b>&lt;.001</b> |
|                                                                                         | Solos     | 438 | 3,47  | 1,95  | 2,93  | 78,78  |                 |
| CO_task cancellation hits made                                                          | Depressed | 65  | 18,51 | 5,22  | 1,54  | 502    | .125            |
|                                                                                         | Solos     | 439 | 17,31 | 5,93  | 1,69  | 90,32  |                 |
| Semantic fluency                                                                        | Depressed | 66  | 19,83 | 5,40  | 1,78  | 507    | .076            |
|                                                                                         | Solos     | 443 | 18,55 | 5,49  | 1,80  | 86,29  |                 |
| Phonological fluency                                                                    | Depressed | 66  | 12,06 | 4,36  | 1,48  | 507    | .141            |
|                                                                                         | Solos     | 443 | 11,05 | 5,29  | 1,70  | 95,96  |                 |
| Number of objects identified                                                            | Depressed | 66  | 15,70 | 4,33  | 1,27  | 508    | .205            |
|                                                                                         | Solos     | 444 | 14,89 | 4,90  | 1,39  | 91,60  |                 |
| <b>Orientation</b>                                                                      | Depressed | 66  | 9,91  | 0,29  | 1,40  | 508    | <b>.047</b>     |
|                                                                                         | Solos     | 444 | 9,82  | 0,48  | 2,00  | 125,96 |                 |

|                                  |           |     |       |      |      |        |             |
|----------------------------------|-----------|-----|-------|------|------|--------|-------------|
| Attention and calculation        | Depressed | 66  | 4,82  | 0,46 | 0,58 | 508    | .565        |
|                                  | Solos     | 444 | 4,78  | 0,55 | 0,66 | 95,00  |             |
| <b>3 Words Memory</b>            | Depressed | 66  | 2,70  | 0,55 | 3,30 | 508    | <b>.000</b> |
|                                  | Solos     | 444 | 2,37  | 0,77 | 4,18 | 105,96 |             |
| <b>Global cognitive function</b> | Depressed | 66  | 29,14 | 0,99 | 2,75 | 508    | <b>.000</b> |
|                                  | Solos     | 444 | 28,62 | 1,47 | 3,67 | 112,71 |             |

| Tabla 5b. Comparison of means between depressed individuals and “solos and depressed” groups. |                     |        |        |                    |        |                    |              |
|-----------------------------------------------------------------------------------------------|---------------------|--------|--------|--------------------|--------|--------------------|--------------|
|                                                                                               | Groups              | Number | Median | standard deviation | t      | Degrees of freedom | P-value      |
| <b>Health status</b>                                                                          | Depressed           | 64     | 3,64   | 0,72               | 2,341  | 207                | <b>0,02</b>  |
|                                                                                               | Solos and depressed | 145    | 3,37   | 0,78               | 2,416  | 129,976            |              |
| Circulation problems (excluding varicose veins). intermittent claudication                    | Depressed           | 66     | 0,18   | 0,39               | -1,245 | 214                | 0,097        |
|                                                                                               | Solos and depressed | 150    | 0,26   | 0,44               | -1,307 | 139,647            |              |
| Osteoarthritis                                                                                | Depressed           | 66     | 0,39   | 0,49               | -1,169 | 214                | 0,121        |
|                                                                                               | Solos and depressed | 150    | 0,48   | 0,50               | -1,177 | 126,344            |              |
| Arthritis or rheumatism                                                                       | Depressed           | 66     | 0,17   | 0,38               | -1,248 | 212                | 0,095        |
|                                                                                               | Solos and depressed | 148    | 0,24   | 0,43               | -1,315 | 141,952            |              |
| Asthma                                                                                        | Depressed           | 0,09   | 0,29   | 0,29               | -0,505 | 213                | 0,307        |
|                                                                                               | Solos and depressed | 0,11   | 0,32   | 0,32               | -0,524 | 136,31             |              |
| Anxiety                                                                                       | Depressed           | 66     | 0,33   | 0,48               | -1,109 | 214                | 0,131        |
|                                                                                               | Solos and depressed | 150    | 0,41   | 0,49               | -1,126 | 128,873            |              |
| <b>Osteoporosis</b>                                                                           | Depressed           | 66     | 0,09   | 0,29               | -2,191 | 214                | <b>0,007</b> |
|                                                                                               | Solos and depressed | 150    | 0,21   | 0,41               | -2,5   | 172,214            |              |
| <b>Chronic back pain</b>                                                                      | Depressed           | 66     | 0,24   | 0,43               | -1,613 | 214                | <b>0,048</b> |
|                                                                                               | Solos and depressed | 150    | 0,35   | 0,48               | -1,68  | 137,087            |              |
| <b>Urinary tract problems (prostate. bladder)</b>                                             | Depressed           | 66     | 0,06   | 0,24               | -2,135 | 213                | <b>0,006</b> |
|                                                                                               | Solos and depressed | 149    | 0,17   | 0,38               | -2,513 | 185,779            |              |

|                                                                                                                                                                                       |                     |     |       |       |        |         |              |
|---------------------------------------------------------------------------------------------------------------------------------------------------------------------------------------|---------------------|-----|-------|-------|--------|---------|--------------|
| <b>During the last 4 weeks. to what extent has any type of pain made it difficult for you to do your usual work (paid work and domestic or care work) or your leisure activities?</b> | Depressed           | 66  | 1,70  | 1,14  | -1,877 | 214     | <b>0,047</b> |
|                                                                                                                                                                                       | Solos and depressed | 150 | 2,05  | 1,35  | -2,004 | 145,686 |              |
| Headache                                                                                                                                                                              | Depressed           | 11  | 1,27  | 2,53  | -0,617 | 56      | 0,54         |
|                                                                                                                                                                                       | Solos and depressed | 47  | 1,83  | 2,73  | -0,647 | 15,915  |              |
| Feet pain                                                                                                                                                                             | Depressed           | 10  | 0,30  | 0,95  | -1,396 | 55      | 0,168        |
|                                                                                                                                                                                       | Solos and depressed | 47  | 1,55  | 2,79  | -2,48  | 43,641  |              |
| Creatinine (mg/dL)                                                                                                                                                                    | Depressed           | 62  | 0,78  | 0,14  | -0,986 | 197     | 0,325        |
|                                                                                                                                                                                       | Solos and depressed | 137 | 0,81  | 0,18  | -1,089 | 151,255 |              |
| Monocyte percentage                                                                                                                                                                   | Depressed           | 45  | 6,99  | 1,22  | 1,481  | 136     | 0,141        |
|                                                                                                                                                                                       | Solos and depressed | 93  | 6,67  | 1,17  | 1,462  | 84,274  |              |
| <b>Age</b>                                                                                                                                                                            | Depressed           | 66  | 61,73 | 8,79  | -1,843 | 214     | <b>0,046</b> |
|                                                                                                                                                                                       | Solos and depressed | 150 | 64,56 | 11,04 | -2,012 | 154,106 |              |
| Level of satisfaction with your life in general                                                                                                                                       | Depressed           | 48  | 6,88  | 1,45  | 0,895  | 176     | 0,372        |
|                                                                                                                                                                                       | Solos and depressed | 130 | 6,65  | 1,47  | 0,899  | 84,632  |              |
| Level of satisfaction with your state of health                                                                                                                                       | Depressed           | 55  | 6,27  | 1,42  | 1,766  | 184     | 0,079        |
|                                                                                                                                                                                       | Solos and depressed | 131 | 5,81  | 1,72  | 1,907  | 121,436 |              |
| <b>Level of satisfaction with the achievements you are currently achieving in life</b>                                                                                                | Depressed           | 46  | 6,96  | 1,32  | 2,643  | 170     | <b>0,005</b> |
|                                                                                                                                                                                       | Solos and depressed | 126 | 6,27  | 1,57  | 2,87   | 94,832  |              |
| Level of satisfaction with personal relationships                                                                                                                                     | Depressed           | 32  | 7,31  | 1,36  | 1,115  | 134     | 0,267        |
|                                                                                                                                                                                       | Solos and depressed | 104 | 7,02  | 1,29  | 1,084  | 49,393  |              |

|                                                                                                |                     |     |       |      |        |         |              |
|------------------------------------------------------------------------------------------------|---------------------|-----|-------|------|--------|---------|--------------|
| <b>Level of satisfaction with how safe and secure you feel</b>                                 | Depressed           | 34  | 7,29  | 0,80 | 2,087  | 146     | <b>0,005</b> |
|                                                                                                | Solos and depressed | 114 | 6,72  | 1,54 | 2,887  | 108,178 |              |
| <b>Level of satisfaction with their feeling of belonging to a community or group of people</b> | Depressed           | 42  | 6,98  | 1,47 | 1,149  | 166     | 0,252        |
|                                                                                                | Solos and depressed | 126 | 6,65  | 1,63 | 1,207  | 76,918  |              |
| <b>Number of diseases</b>                                                                      | Depressed           | 65  | 4,34  | 2,26 | -2,267 | 208     | <b>0,012</b> |
|                                                                                                | Solos and depressed | 145 | 5,17  | 2,52 | -2,364 | 136,568 |              |
| <b>CO_task cancellation hits made</b>                                                          | Depressed           | 65  | 18,51 | 5,22 | 2,487  | 211     | <b>0,007</b> |
|                                                                                                | Solos and depressed | 148 | 16,17 | 6,74 | 2,744  | 155,732 |              |
| <b>Semantic fluency</b>                                                                        | Depressed           | 66  | 19,83 | 5,40 | 2,45   | 214     | <b>0,015</b> |
|                                                                                                | Solos and depressed | 150 | 17,63 | 6,35 | 2,61   | 144,938 |              |
| <b>Phonological fluency</b>                                                                    | Depressed           | 66  | 12,06 | 4,36 | 1,774  | 214     | <b>0,047</b> |
|                                                                                                | Solos and depressed | 150 | 10,61 | 5,96 | 1,998  | 166,649 |              |
| <b>Number of objects identified</b>                                                            | Depressed           | 66  | 15,70 | 4,33 | 2,047  | 214     | <b>0,033</b> |
|                                                                                                | Solos and depressed | 150 | 14,25 | 4,95 | 2,157  | 140,951 |              |
| <b>Orientation</b>                                                                             | Depressed           | 66  | 9,91  | 0,29 | 2,283  | 214     | <b>0,003</b> |
|                                                                                                | Solos and depressed | 150 | 9,71  | 0,67 | 3,001  | 213,976 |              |
| <b>Attention and calculation</b>                                                               | Depressed           | 66  | 4,82  | 0,46 | 1,78   | 214     | <b>0,044</b> |
|                                                                                                | Solos and depressed | 150 | 4,66  | 0,65 | 2,03   | 172,083 |              |
| <b>3 Words Memory</b>                                                                          | Depressed           | 66  | 2,70  | 0,55 | 2,466  | 214     | <b>0,007</b> |
|                                                                                                | Solos and depressed | 150 | 2,45  | 0,74 | 2,752  | 162,794 |              |
| <b>Global cognitive function</b>                                                               | Depressed           | 66  | 29,14 | 0,99 | 3,248  | 214     | <b>0</b>     |
|                                                                                                | Solos and depressed | 150 | 28,47 | 1,54 | 3,824  | 185,328 |              |

| Tabla 5c. Comparison of means between solos and “solos and depressed” groups.                                                                                                         |                     |        |        |                    |        |                    |                 |
|---------------------------------------------------------------------------------------------------------------------------------------------------------------------------------------|---------------------|--------|--------|--------------------|--------|--------------------|-----------------|
|                                                                                                                                                                                       | Groups              | Number | Median | standard deviation | t      | Degrees of freedom | P-value         |
| <b>Health status</b>                                                                                                                                                                  | Solos               | 433    | 3,71   | 0,68               | 5,006  | 576                | <b>0,000</b>    |
|                                                                                                                                                                                       | Solos and depressed | 145    | 3,37   | 0,78               | 4,667  | 221,242            |                 |
| <b>Circulation problems (excluding varicose veins). intermittent claudication</b>                                                                                                     | Solos               | 443    | 0,16   | 0,37               | -2,585 | 591                | <b>0,009</b>    |
|                                                                                                                                                                                       | Solos and depressed | 150    | 0,26   | 0,44               | -2,378 | 225,112            |                 |
| <b>Osteoarthritis</b>                                                                                                                                                                 | Solos               | 444    | 0,33   | 0,47               | -3,239 | 592                | <b>&lt;.001</b> |
|                                                                                                                                                                                       | Solos and depressed | 150    | 0,48   | 0,50               | -3,144 | 244,231            |                 |
| <b>Arthritis or rheumatism</b>                                                                                                                                                        | Solos               | 444    | 0,15   | 0,36               | -2,65  | 590                | <b>0,008</b>    |
|                                                                                                                                                                                       | Solos and depressed | 148    | 0,24   | 0,43               | -2,412 | 217,957            |                 |
| <b>Asthma</b>                                                                                                                                                                         | Solos               | 443    | 0,04   | 0,20               | -3,167 | 590                | <b>0,006</b>    |
|                                                                                                                                                                                       | Solos and depressed | 149    | 0,11   | 0,32               | -2,556 | 189,814            |                 |
| <b>Anxiety</b>                                                                                                                                                                        | Solos               | 444    | 0,09   | 0,28               | -9,886 | 592                | <b>&lt;.001</b> |
|                                                                                                                                                                                       | Solos and depressed | 150    | 0,41   | 0,49               | -7,654 | 183,197            |                 |
| <b>Osteoporosis</b>                                                                                                                                                                   | Solos               | 444    | 0,11   | 0,32               | -3,025 | 592                | <b>0,004</b>    |
|                                                                                                                                                                                       | Solos and depressed | 150    | 0,21   | 0,41               | -2,674 | 212,935            |                 |
| <b>Chronic back pain</b>                                                                                                                                                              | Solos               | 444    | 0,19   | 0,39               | -4,11  | 592                | <b>&lt;.001</b> |
|                                                                                                                                                                                       | Solos and depressed | 150    | 0,35   | 0,48               | -3,731 | 220,782            |                 |
| <b>Urinary tract problems (prostate. bladder)</b>                                                                                                                                     | Solos               | 444    | 0,10   | 0,31               | -2,092 | 591                | <b>0,030</b>    |
|                                                                                                                                                                                       | Solos and depressed | 149    | 0,17   | 0,38               | -1,89  | 217,491            |                 |
| <b>During the last 4 weeks. to what extent has any type of pain made it difficult for you to do your usual work (paid work and domestic or care work) or your leisure activities?</b> | Solos               | 444    | 1,69   | 1,10               | -3,272 | 592                | <b>0,003</b>    |

|                                                                                        |                     |     |       |       |        |         |              |
|----------------------------------------------------------------------------------------|---------------------|-----|-------|-------|--------|---------|--------------|
|                                                                                        | Solos and depressed | 150 | 2,05  | 1,35  | -2,959 | 219,651 |              |
| <b>Headache</b>                                                                        | Solos               | 85  | 0,82  | 1,87  | -2,501 | 130     | <b>0,027</b> |
|                                                                                        | Solos and depressed | 47  | 1,83  | 2,73  | -2,252 | 70,435  |              |
| Feet pain                                                                              | Solos               | 87  | 1,49  | 2,61  | -0,122 | 132     | 0,903        |
|                                                                                        | Solos and depressed | 47  | 1,55  | 2,79  | -0,119 | 89,033  |              |
| <b>Creatinine (mg/dL)</b>                                                              | Solos               | 425 | 0,86  | 0,23  | 2,51   | 560     | <b>0,012</b> |
|                                                                                        | Solos and depressed | 137 | 0,81  | 0,18  | 2,827  | 288,034 |              |
| <b>Monocyte percentage</b>                                                             | Solos               | 311 | 7,14  | 1,12  | 3,559  | 402     | <b>0,000</b> |
|                                                                                        | Solos and depressed | 93  | 6,67  | 1,17  | 3,467  | 145,533 |              |
| Age                                                                                    | Solos               | 444 | 64,64 | 10,09 | 0,079  | 592     | 0,937        |
|                                                                                        | Solos and depressed | 150 | 64,56 | 11,04 | 0,076  | 238,595 |              |
| <b>Level of satisfaction with your life in general</b>                                 | Solos               | 344 | 7,04  | 1,17  | 2,963  | 472     | <b>0,008</b> |
|                                                                                        | Solos and depressed | 130 | 6,65  | 1,47  | 2,68   | 194,437 |              |
| <b>Level of satisfaction with your state of health</b>                                 | Solos               | 364 | 6,66  | 1,43  | 5,508  | 493     | <b>0,000</b> |
|                                                                                        | Solos and depressed | 131 | 5,81  | 1,72  | 5,059  | 198,742 |              |
| <b>Level of satisfaction with the achievements you are currently achieving in life</b> | Solos               | 358 | 6,84  | 1,38  | 3,808  | 482     | <b>0,000</b> |
|                                                                                        | Solos and depressed | 126 | 6,27  | 1,57  | 3,58   | 197,102 |              |
| <b>Level of satisfaction with personal relationships</b>                               | Solos               | 305 | 7,32  | 0,98  | 2,496  | 407     | <b>0,030</b> |
|                                                                                        | Solos and depressed | 104 | 7,02  | 1,29  | 2,19   | 146,075 |              |
| <b>Level of satisfaction with how safe and secure you feel</b>                         | Solos               | 325 | 7,09  | 1,19  | 2,651  | 437     | <b>0,020</b> |
|                                                                                        | Solos and depressed | 114 | 6,72  | 1,54  | 2,347  | 162,875 |              |
| <b>Level of satisfaction with their feeling of belonging to a</b>                      | Solos               | 347 | 6,98  | 1,34  | 2,203  | 471     | <b>0,045</b> |

|                                     |                     |     |       |      |        |         |                 |
|-------------------------------------|---------------------|-----|-------|------|--------|---------|-----------------|
| <b>community or group of people</b> |                     |     |       |      |        |         |                 |
|                                     | Solos and depressed | 126 | 6,65  | 1,63 | 2,015  | 190,321 |                 |
| <b>Number of diseases</b>           | Solos               | 438 | 3,47  | 1,95 | -8,381 | 581     | <b>&lt;.001</b> |
|                                     | Solos and depressed | 145 | 5,17  | 2,52 | -7,376 | 203,906 |                 |
| CO_task cancellation hits made      | Solos               | 439 | 17,31 | 5,93 | 1,961  | 585     | 0,067           |
|                                     | Solos and depressed | 148 | 16,17 | 6,74 | 1,841  | 228,475 |                 |
| Semantic fluency                    | Solos               | 443 | 18,55 | 5,49 | 1,694  | 591     | 0,091           |
|                                     | Solos and depressed | 150 | 17,63 | 6,35 | 1,576  | 228,927 |                 |
| Phonological fluency                | Solos               | 443 | 11,05 | 5,29 | 0,849  | 591     | 0,396           |
|                                     | Solos and depressed | 150 | 10,61 | 5,96 | 0,801  | 233,518 |                 |
| Number of objects identified        | Solos               | 444 | 14,89 | 4,90 | 1,366  | 592     | 0,172           |
|                                     | Solos and depressed | 150 | 14,25 | 4,95 | 1,359  | 254,474 |                 |
| Orientation                         | Solos               | 444 | 9,82  | 0,48 | 2,2    | 592     | 0,062           |
|                                     | Solos and depressed | 150 | 9,71  | 0,67 | 1,875  | 203,403 |                 |
| <b>Attention and calculation</b>    | Solos               | 444 | 4,78  | 0,55 | 2,14   | 592     | <b>0,050</b>    |
|                                     | Solos and depressed | 150 | 4,66  | 0,65 | 1,968  | 225,021 |                 |
| 3 Words Memory                      | Solos               | 444 | 2,37  | 0,77 | -1,016 | 592     | 0,310           |
|                                     | Solos and depressed | 150 | 2,45  | 0,74 | -1,035 | 265,491 |                 |
| Global cognitive function           | Solos               | 444 | 28,62 | 1,47 | 1,103  | 592     | 0,270           |
|                                     | Solos and depressed | 150 | 28,47 | 1,54 | 1,078  | 246,899 |                 |
