# Supplementary material for: Loneliness, Depression, and Genetics in the Elderly: Prognostic Factors of a Worse Health Condition?
Source: MDPI journal article supplement (doi:10.3390/ijerph192315456), 2022-11-22
Supplement: s1 [file s1]

| Tabla S2. Comparison of means between depressed individuals and solos groups in men. |           |        |        |                    |        |                    |                 |
|--------------------------------------------------------------------------------------|-----------|--------|--------|--------------------|--------|--------------------|-----------------|
|                                                                                      | Groups    | Number | Median | standard deviation | t      | Degrees of freedom | P-value         |
| <b>heart attack</b>                                                                  | Depressed | 12     | 0,00   | 0,00               | - 1,01 | 253,00             | <b>&lt;.001</b> |
|                                                                                      | Solos     | 243    | 0,08   | 0,27               | - 4,53 | 242,00             |                 |
| Angina pectoris                                                                      | Depressed | 12     | 0,00   | 0,00               | - 0,68 | 254,00             | 0,250           |
|                                                                                      | Solos     | 244    | 0,04   | 0,19               | - 3,05 | 243,00             |                 |
| <b>Circulation problems (excluding varicose veins). intermittent claudication</b>    | Depressed | 12     | 0,00   | 0,00               | - 1,25 | 253,00             | <b>&lt;.001</b> |
|                                                                                      | Solos     | 243    | 0,12   | 0,32               | - 5,61 | 242,00             |                 |
| Anxiety                                                                              | Depressed | 12     | 0,25   | 0,45               | 3,09   | 254,00             | 0,073           |
|                                                                                      | Solos     | 244    | 0,05   | 0,21               | 1,56   | 11,23              |                 |
| Embolism / cerebral stroke                                                           | Depressed | 12     | 0,00   | 0,00               | - 0,64 | 254,00             | 0,263           |
|                                                                                      | Solos     | 244    | 0,03   | 0,18               | - 2,87 | 243,00             |                 |
| <b>Malignant tumors/ Cancer</b>                                                      | Depressed | 12     | 0,00   | 0,00               | - 1,22 | 253,00             | <b>&lt;.001</b> |
|                                                                                      | Solos     | 243    | 0,11   | 0,32               | - 5,50 | 242,00             |                 |
| <b>Eosinophils (x1000/mm3)</b>                                                       | Depressed | 12     | 2,51   | 19,08              | 2,14   | 238                | <b>0,034</b>    |
|                                                                                      | Solos     | 228    | 1,74   | 11,65              | 1,38   | 11,44              |                 |
| Monocyte percentage                                                                  | Depressed | 8      | 76,38  | 100,70             | 0,90   | 165                | 0,369           |
|                                                                                      | Solos     | 159    | 73,13  | 99,25              | 0,89   | 7,70               |                 |
| Number of diseases                                                                   | Depressed | 12     | 3,92   | 2,23               | 1,42   | 252,00             | 0,078           |
|                                                                                      | Solos     | 242    | 3,14   | 1,83               | 1,18   | 11,74              |                 |
| <b>Orientation</b>                                                                   | Depressed | 12     | 10,00  | 0                  | 1,16   | 254                | <b>0,000</b>    |
|                                                                                      | Solos     | 244    | 9,85   | 438                | 5,26   | 243,00             |                 |
| <b>3 Words Memory</b>                                                                | Depressed | 12     | 2,75   | 452                | 1,70   | 254                | <b>0,014</b>    |
|                                                                                      | Solos     | 244    | 2,36   | 786                | 2,78   | 14,50              |                 |
| <b>How many hours a day do you spend sitting?</b>                                    | Depressed | 11     | 1,55   | 522                | - 2,56 | 253                | <b>0,011</b>    |
|                                                                                      | Solos     | 244    | 2,23   | 884                | - 4,11 | 12,74              |                 |
| <b>Yale Sitting Index</b>                                                            | Depressed | 11     | 1,55   | 522                | - 2,56 | 253                | <b>0,011</b>    |
|                                                                                      | Solos     | 244    | 2,23   | 884                | - 4,11 | 12,74              |                 |

Tabla 6b. Comparison of means between depressed individuals and “solos and depressed” groups in men.

|                                                                                   | Groups              | Number | Median | standard deviation | t     | Degrees of freedom | P-value      |
|-----------------------------------------------------------------------------------|---------------------|--------|--------|--------------------|-------|--------------------|--------------|
| heart attack                                                                      | Depressed           | 12     | 0,00   | 0,00               | -0,78 | 50,00              | 0,220        |
|                                                                                   | Solos and depressed | 40     | 0,05   | 0,22               | -1,43 | 39,00              |              |
| Angina pectoris                                                                   | Depressed           | 12     | 0,00   | 0,00               |       |                    |              |
|                                                                                   | Solos and depressed | 40     | 0,00   | 0,00               |       |                    |              |
| <b>Circulation problems (excluding varicose veins). intermittent claudication</b> | Depressed           | 12     | 0,00   | 0,00               | -1,28 | 50,00              | <b>0,012</b> |
|                                                                                   | Solos and depressed | 40     | 0,13   | 0,34               | -2,36 | 39,00              |              |
| Anxiety                                                                           | Depressed           | 12     | 0,25   | 0,45               | -0,17 | 50,00              | 0,434        |
|                                                                                   | Solos and depressed | 40     | 0,28   | 0,45               | -0,17 | 18,13              |              |
| Embolism / cerebral stroke                                                        | Depressed           | 12     | 0,00   | 0,00               |       |                    |              |
|                                                                                   | Solos and depressed | 40     | 0,00   | 0,00               |       |                    |              |
| <b>Malignant tumors/ Cancer</b>                                                   | Depressed           | 12     | 0,00   | 0,00               | -1,13 | 50,00              | <b>0,022</b> |
|                                                                                   | Solos and depressed | 40     | 0,10   | 0,30               | -2,08 | 39,00              |              |
| Eosinophils (x1000/mm3)                                                           | Depressed           | 12     | 2,51   | 19,08              | 1,19  | 45,00              | 0,242        |
|                                                                                   | Solos and depressed | 35     | 1,97   | 11,04              | 0,92  | 13,61              |              |
| Monocyte percentage                                                               | Depressed           | 8      | 76,38  | 100,70             | 1,87  | 27,00              | 0,073        |
|                                                                                   | Solos and depressed | 21     | 68,29  | 105,55             | 1,91  | 13,27              |              |
| Number of diseases                                                                | Depressed           | 12     | 3,92   | 2,23               | -0,27 | 49,00              | 0,394        |
|                                                                                   | Solos and depressed | 39     | 4,10   | 2,02               | -0,26 | 16,94              |              |
| <b>Orientation</b>                                                                | Depressed           | 12     | 10,00  | 0,00               | 1,21  | 50,00              | <b>0,016</b> |
|                                                                                   | Solos and depressed | 40     | 9,85   | 0,43               | 2,22  | 39,00              |              |
| 3 Words Memory                                                                    | Depressed           | 12     | 2,75   | 452,00             | 1,54  | 50,00              | 0,130        |
|                                                                                   | Solos and depressed | 40     | 2,40   | 744,00             | 1,99  | 30,46              |              |
| How many hours a day do you spend sitting?                                        | Depressed           | 11     | 1,55   | 522,00             | -1,81 | 48,00              | 0,077        |
|                                                                                   | Solos and depressed | 39     | 2,08   | 929,00             | -2,45 | 29,60              |              |
| Yale Sitting Index                                                                | Depressed           | 11     | 1,55   | 522,00             | -1,81 | 48,00              | 0,077        |
|                                                                                   | Solos and depressed | 39     | 2,08   | 929,00             | -2,45 | 29,60              |              |

| Tabla 6c. Comparison of means between solos and “solos and depressed” groups in men. |                     |        |        |                    |       |                    |              |
|--------------------------------------------------------------------------------------|---------------------|--------|--------|--------------------|-------|--------------------|--------------|
|                                                                                      | Groups              | Number | Median | standard deviation | t     | Degrees of freedom | P-value      |
| heart attack                                                                         | Solos               | 243    | 0,08   | 0,27               | 0,63  | 281,00             | 0,265        |
|                                                                                      | Solos and depressed | 40     | 0,05   | 0,22               | 0,72  | 59,83              |              |
| <b>Angina pectoris</b>                                                               | Solos               | 244    | 0,04   | 0,19               | 1,23  | 282,00             | <b>0,001</b> |
|                                                                                      | Solos and depressed | 40     | 0,00   | 0,00               | 3,05  | 243,00             |              |
| Circulation problems (excluding varicose veins). intermittent claudication           | Solos               | 243    | 0,12   | 0,32               | -0,18 | 281,00             | 0,429        |
|                                                                                      | Solos and depressed | 40     | 0,13   | 0,34               | -0,17 | 51,41              |              |
| <b>Anxiety</b>                                                                       | Solos               | 244    | 0,05   | 0,21               | -5,27 | 282,00             | <b>0,001</b> |
|                                                                                      | Solos and depressed | 40     | 0,28   | 0,45               | -3,16 | 41,74              |              |
| <b>Embolism / cerebral stroke</b>                                                    | Solos               | 244    | 0,03   | 0,18               | 1,16  | 282,00             | <b>0,002</b> |
|                                                                                      | Solos and depressed | 40     | 0,00   | 0,00               | 2,87  | 243,00             |              |
| Malignant tumors/ Cancer                                                             | Solos               | 243    | 0,11   | 0,32               | 0,21  | 281,00             | 0,418        |
|                                                                                      | Solos and depressed | 40     | 0,10   | 0,30               | 0,21  | 53,74              |              |
| Eosinophils (x1000/mm3)                                                              | Solos               | 228    | 1,74   | 11,65              | -1,10 | 0,26               | 0,271        |
|                                                                                      | Solos and depressed | 35     | 1,97   | 11,04              | -1,15 | 46,43              |              |
| <b>Monocyte percentage</b>                                                           | Solos               | 159    | 73,13  | 99,25              | 2,09  | 0,18               | <b>0,038</b> |
|                                                                                      | Solos and depressed | 21     | 68,29  | 105,55             | 1,99  | 24,90              |              |
| <b>Number of diseases</b>                                                            | Solos               | 242    | 3,14   | 1,83               | -3,01 | 0,28               | <b>0,001</b> |
|                                                                                      | Solos and depressed | 39     | 4,10   | 2,02               | -2,79 | 48,49              |              |
| Orientation                                                                          | Solos               | 244    | 9,85   | 0,44               | 0,03  | 0,28               | 0,974        |
|                                                                                      | Solos and depressed | 40     | 9,85   | 0,43               | 0,03  | 53,41              |              |
| 3 Words Memory                                                                       | Solos               | 244    | 2,36   | 0,79               | -0,30 | 0,28               | 0,768        |
|                                                                                      | Solos and depressed | 40     | 2,40   | 0,74               | -0,31 | 54,29              |              |
| How many hours a day do you spend sitting?                                           | Solos               | 244    | 2,23   | 0,88               | 1,02  | 0,28               | 0,308        |
|                                                                                      | Solos and depressed | 39     | 2,08   | 0,93               | 0,99  | 49,63              |              |
| Yale Sitting Index                                                                   | Solos               | 244    | 2,23   | 0,88               | 1,02  | 0,28               | 0,308        |
|                                                                                      | Solos and depressed | 39     | 2,08   | 0,93               | 0,99  | 49,63              |              |
