# Supplementary material for: Loneliness, Depression, and Genetics in the Elderly: Prognostic Factors of a Worse Health Condition?
Source: MDPI journal article supplement (doi:10.3390/ijerph192315456), 2022-11-22
Supplement: s1 [file s1]

| Table S4. Logistic regression analysis between SNPs and controls and “solo and depressed” groups. |              |          |                    |                               |                          |         |
|---------------------------------------------------------------------------------------------------|--------------|----------|--------------------|-------------------------------|--------------------------|---------|
| SNP                                                                                               | Model        | Genotype | <b>CONTROL (N)</b> | <b>SOLO AND DEPRESSED (N)</b> | OR (95% CI)              | P-value |
| rs182549                                                                                          | Log-additive | CC       | 38                 | 14                            | 0,51 (0,27-0,96)         | 0,03    |
|                                                                                                   |              | CT       | 59                 | 16                            |                          |         |
|                                                                                                   |              | TT       | 23                 | 1                             |                          |         |
| rs2154110                                                                                         | Recessive    | TT/GT    | 119                | 27                            | 1<br>17,63 (1,89-164,09) | 0,0035  |
|                                                                                                   |              | GG       | 1                  | 4                             |                          |         |
| rs4902100                                                                                         | Recessive    | AA/AG    | 119                | 27                            | 1<br>17,63 (1,89-164,09) | 0,0035  |
|                                                                                                   |              | GG       | 1                  | 4                             |                          |         |
| rs6265                                                                                            | Log-additive | CC       | 81                 | 14                            | 2,94 (1,42-6,11)         | 0,0034  |
|                                                                                                   |              | CT       | 39                 | 14                            |                          |         |
|                                                                                                   |              | TT       | 0                  | 3                             |                          |         |

| Table 8b. Logistic regression analysis between SNPs and controls and depressed groups. |              |          |                     |                      |                       |         |
|----------------------------------------------------------------------------------------|--------------|----------|---------------------|----------------------|-----------------------|---------|
| SNP                                                                                    | Model        | Genotype | <b>CONTROLS (N)</b> | <b>DEPRESSED (N)</b> | OR (95% CI)           | P-value |
| rs10904887                                                                             | Dominant     | TT       | 33                  | 4                    | 1<br>0.09 (0.01-0.88) | 0.017   |
|                                                                                        |              | CT/CC    | 87                  | 1                    |                       |         |
| rs10904896                                                                             | Dominant     | GG       | 33                  | 4                    | 1<br>0.09(0.01-0.88)  | 0.017   |
|                                                                                        |              | AG/AA    | 87                  | 1                    |                       |         |
| rs12335203                                                                             | Log-additive | TT       | 25                  | 4                    | 0.09(0.01-0.74)       | 0,0041  |
|                                                                                        |              | CT       | 67                  | 1                    |                       |         |
|                                                                                        |              | CC       | 28                  | 0                    |                       |         |
| rs2154110                                                                              | Log-additive | TT       | 64                  | 1                    | 6.88 (1.03-46.13)     | 0.031   |
|                                                                                        |              | GT       | 55                  | 3                    |                       |         |
|                                                                                        |              | GG       | 1                   | 1                    |                       |         |
| rs391300                                                                               | Log-additive | CC       | 27                  | 4                    | 0.09(0.01-0.80)       | 0.0056  |
|                                                                                        |              | CT       | 66                  | 1                    |                       |         |
|                                                                                        |              | TT       | 27                  | 0                    |                       |         |
|                                                                                        |              | GG       | 1                   | 1                    |                       |         |

| Table 8C. Logistic regression analysis between SNPs and controls and solo groups. |       |          |                     |                 |             |         |
|-----------------------------------------------------------------------------------|-------|----------|---------------------|-----------------|-------------|---------|
| SNP                                                                               | Model | Genotype | <b>CONTROLS (N)</b> | <b>SOLO (N)</b> | OR (95% CI) | P-value |

|            |              |                |               |                |                                |        |
|------------|--------------|----------------|---------------|----------------|--------------------------------|--------|
| rs10509637 | Dominant     | AA<br>AG/GG    | 79<br>41      | 118<br>35      | 1<br>0.57 (0.33-<br>0.99)      | 0.039  |
| rs12335203 | Dominant     | CC<br>CT/TT    | 28<br>92      | 53<br>100      | 1<br>0.57(0.34-<br>0.98)       | 0.041  |
| rs2154110  | Codominant   | TT<br>GT<br>GG | 64<br>55<br>1 | 91<br>48<br>14 | 1<br><br>9.85(1.26-<br>76.78)  | 0.0007 |
| rs391300   | Dominant     | CC<br>CT/TT    | 27<br>93      | 60<br>92       | 1<br>0.45(0.26-<br>0.76)       | 0.0026 |
| rs4902100  | Codominant   | AA<br>AG<br>GG | 67<br>52<br>1 | 92<br>47<br>14 | 1<br><br>10.20(1.31-<br>79.44) | 0.001  |
| rs7675998  | Dominant     | GG<br>AG/AA    | 56<br>64      | 95<br>58       | 1<br>0.53(0.33-<br>0.87)       | 0.011  |
| rs7412     | Log-additive | CC<br>TC<br>TT | 98<br>19<br>3 | 138<br>14<br>1 | 0.51(0.27-<br>0.96)            | 0.032  |
