# Supplementary material for: Loneliness, Depression, and Genetics in the Elderly: Prognostic Factors of a Worse Health Condition?
Source: MDPI journal article supplement (doi:10.3390/ijerph192315456), 2022-11-22
Supplement: s1 [file s1]

| Tabla S3. Comparison of means between depressed individuals and solos groups in women.                                                                                         |           |        |        |                    |         |                    |              |
|--------------------------------------------------------------------------------------------------------------------------------------------------------------------------------|-----------|--------|--------|--------------------|---------|--------------------|--------------|
|                                                                                                                                                                                | Groups    | Number | Median | standard deviation | t       | Degrees of freedom | P-value      |
| Health status                                                                                                                                                                  | Depressed | 52     | 3,650  | 0,738              | - 0,142 | 244                | 0,887        |
|                                                                                                                                                                                | Solos     | 194    | 3,670  | 0,730              | - 0,141 | 79,827             |              |
| Heart attack                                                                                                                                                                   | Depressed | 54     | 0,060  | 0,231              | 3,416   | 252,000            | 0,083        |
|                                                                                                                                                                                | Solos     | 200    | 0,000  | 0,000              | 1,766   | 53,000             |              |
| <b>Anxiety</b>                                                                                                                                                                 | Depressed | 54     | 0,350  | 0,482              | 3,635   | 252,000            | <b>0,004</b> |
|                                                                                                                                                                                | Solos     | 200    | 0,140  | 0,348              | 3,024   | 68,591             |              |
| <b>Osteoporosis</b>                                                                                                                                                            | Depressed | 54     | 0,110  | 0,317              | - 1,859 | 252,000            | <b>0,032</b> |
|                                                                                                                                                                                | Solos     | 200    | 0,230  | 0,419              | - 2,176 | 108,191            |              |
| Chronic back pain                                                                                                                                                              | Depressed | 54     | 0,220  | 0,420              | - 0,420 | 252,000            | 0,675        |
|                                                                                                                                                                                | Solos     | 200    | 0,250  | 0,434              | - 0,428 | 86,135             |              |
| Urinary tract problems (prostate. bladder)                                                                                                                                     | Depressed | 54     | 0,060  | 0,231              | 0,164   | 252,000            | 0,870        |
|                                                                                                                                                                                | Solos     | 200    | 0,050  | 0,218              | 0,158   | 80,394             |              |
| During the last 4 weeks. to what extent has any type of pain made it difficult for you to do your usual work (paid work and domestic or care work) or your leisure activities? | Depressed | 54     | 1,780  | 1,176              | - 0,924 | 252                | 0,356        |
|                                                                                                                                                                                | Solos     | 200    | 1,960  | 1,269              | - 0,966 | 89,213             |              |
| Headache                                                                                                                                                                       | Depressed | 11     | 1,270  | 2,533              | 1,253   | 65                 | 0,215        |
|                                                                                                                                                                                | Solos     | 56     | 0,590  | 1,437              | 0,868   | 11,295             |              |
| <b>Feet pain</b>                                                                                                                                                               | Depressed | 9      | 0,000  | 0,000              | - 1,987 | 65                 | <b>0,000</b> |
|                                                                                                                                                                                | Solos     | 58     | 1,760  | 2,638              | - 5,077 | 57,000             |              |
| Eosinophils (x1000/mm3)                                                                                                                                                        | Depressed | 51     | 0,159  | 0,126              | - 0,726 | 243                | 0,469        |
|                                                                                                                                                                                | Solos     | 194    | 0,177  | 0,161              | - 0,837 | 97,674             |              |
| Monocyte percentage                                                                                                                                                            | Depressed | 37     | 6,849  | 1,223              | - 0,539 | 187                | 0,591        |

|                                                                                         |           |     |        |        |            |         |              |
|-----------------------------------------------------------------------------------------|-----------|-----|--------|--------|------------|---------|--------------|
|                                                                                         | Solos     | 152 | 6,968  | 1,210  | -<br>0,535 | 54,470  |              |
| Level of satisfaction with your life in general                                         | Depressed | 37  | 7,050  | 1,224  | -<br>0,108 | 196     | 0,914        |
|                                                                                         | Solos     | 161 | 7,070  | 0,997  | -<br>0,095 | 47,581  |              |
| Level of satisfaction with his health                                                   | Depressed | 44  | 6,300  | 1,250  | -<br>1,228 | 210     | 0,221        |
|                                                                                         | Solos     | 168 | 6,580  | 1,382  | -<br>1,302 | 73,029  |              |
| Level of satisfaction with the achievements you are currently achieving in life         | Depressed | 36  | 7,170  | 1,134  | 1,338      | 193     | 0,183        |
|                                                                                         | Solos     | 159 | 6,850  | 1,318  | 1,471      | 58,469  |              |
| Level of satisfaction with personal relationships                                       | Depressed | 22  | 7,590  | 0,590  | 1,108      | 159     | 0,270        |
|                                                                                         | Solos     | 139 | 7,380  | 0,855  | 1,443      | 36,630  |              |
| Level of satisfaction with how safe and secure you feel                                 | Depressed | 28  | 7,360  | 0,780  | 0,426      | 173     | 0,671        |
|                                                                                         | Solos     | 147 | 7,270  | 1,087  | 0,532      | 49,438  |              |
| Level of satisfaction with their feeling of belonging to a community or group of people | Depressed | 32  | 7,250  | 0,950  | 0,978      | 189     | 0,329        |
|                                                                                         | Solos     | 159 | 7,020  | 1,265  | 1,181      | 55,671  |              |
| Number of diseases                                                                      | Depressed | 53  | 4,434  | 2,275  | 1,699      | 0,247   | 0,091        |
|                                                                                         | Solos     | 196 | 3,888  | 2,020  | 1,587      | 75,624  |              |
| Orientation                                                                             | Depressed | 54  | 9,890  | 0,317  | 1,316      | 252     | 0,189        |
|                                                                                         | Solos     | 200 | 9,790  | 0,527  | 1,735      | 140,489 |              |
| Attention and calculation                                                               | Depressed | 54  | 4,800  | 0,491  | 1,328      | 252     | 0,186        |
|                                                                                         | Solos     | 200 | 4,670  | 0,651  | 1,558      | 108,730 |              |
| <b>3 Words Memory</b>                                                                   | Depressed | 54  | 2,690  | 0,577  | 2,709      | 252     | <b>0,002</b> |
|                                                                                         | Solos     | 200 | 2,390  | 0,742  | 3,126      | 105,304 |              |
| <b>Reading</b>                                                                          | Depressed | 54  | 1,000  | 0,000  | 1,046      | 252     | <b>0,045</b> |
|                                                                                         | Solos     | 200 | 0,980  | 0,140  | 2,015      | 199,000 |              |
| <b>Global cognitive function</b>                                                        | Depressed | 54  | 29,060 | 1,017  | 2,714      | 252     | <b>0,001</b> |
|                                                                                         | Solos     | 200 | 28,440 | 1,593  | 3,477      | 131,152 |              |
| <b>How many minutes of nap do you usually sleep each day?</b>                           | Depressed | 54  | 20,390 | 25,574 | 2,074      | 252     | <b>0,039</b> |
|                                                                                         | Solos     | 200 | 13,060 | 22,325 | 1,918      | 76,195  |              |
| How often do you wake up rested in the morning?                                         | Depressed | 54  | 2,350  | 0,850  | -<br>1,578 | 250     | 0,116        |

|                                                              |           |     |        |         |            |         |              |
|--------------------------------------------------------------|-----------|-----|--------|---------|------------|---------|--------------|
|                                                              | Solos     | 198 | 2,530  | 0,703   | -<br>1,416 | 73,905  |              |
| Sleeping difficulties                                        | Depressed | 54  | 1,930  | 1,330   | -<br>0,403 | 251     | 0,687        |
|                                                              | Solos     | 199 | 2,000  | 1,159   | -<br>0,373 | 76,242  |              |
| Waking up multiple times while sleeping                      | Depressed | 54  | 2,690  | 1,464   | 1,276      | 251     | 0,203        |
|                                                              | Solos     | 199 | 2,430  | 1,277   | 1,179      | 76,248  |              |
| How many hours a day do you spend moving while doing things? | Depressed | 54  | 3,590  | 1,108   | -<br>1,724 | 251     | 0,086        |
|                                                              | Solos     | 199 | 3,870  | 1,054   | -<br>1,675 | 80,918  |              |
| How many hours a day do you spend on your feet?              | Depressed | 54  | 3,090  | 1,233   | -<br>1,708 | 251     | 0,089        |
|                                                              | Solos     | 199 | 3,420  | 1,240   | -<br>1,713 | 84,391  |              |
| Yale Movement Index                                          | Depressed | 54  | 10,780 | 3,323   | -<br>1,724 | 251     | 0,086        |
|                                                              | Solos     | 199 | 11,620 | 3,161   | -<br>1,675 | 80,918  |              |
| Yale Standing Index                                          | Depressed | 54  | 6,190  | 2,465   | -<br>1,708 | 251     | 0,089        |
|                                                              | Solos     | 199 | 6,830  | 2,480   | -<br>1,713 | 84,391  |              |
| CO_task cancellation row has crossed out the last letter     | Depressed | 54  | 11,500 | 4,325   | 0,445      | 250     | 0,657        |
|                                                              | Solos     | 198 | 11,190 | 4,650   | 0,464      | 89,297  |              |
| CO_task cancellation last letter crossed out                 | Depressed | 54  | #####  | 130,259 | 0,399      | 250     | 0,690        |
|                                                              | Solos     | 198 | #####  | 140,123 | 0,416      | 89,338  |              |
| CO_task cancellation hits made                               | Depressed | 54  | 18,520 | 5,524   | 1,430      | 250     | 0,154        |
|                                                              | Solos     | 198 | 17,230 | 5,974   | 1,496      | 89,742  |              |
| CO_task cancellation commission errors made                  | Depressed | 54  | 0,300  | 1,253   | 2,195      | 250     | 0,206        |
|                                                              | Solos     | 198 | 0,080  | 0,348   | 1,280      | 55,246  |              |
| CO_task cancellation hits should be                          | Depressed | 54  | 26,910 | 11,042  | 0,424      | 250     | 0,672        |
|                                                              | Solos     | 198 | 26,140 | 11,966  | 0,444      | 89,903  |              |
| Semantic fluency                                             | Depressed | 54  | 19,850 | 5,343   | 1,936      | 252     | 0,054        |
|                                                              | Solos     | 200 | 18,250 | 5,431   | 1,954      | 84,936  |              |
| <b>Phonological fluency</b>                                  | Depressed | 54  | 12,540 | 3,830   | 1,848      | 252     | <b>0,026</b> |
|                                                              | Solos     | 200 | 11,080 | 5,457   | 2,255      | 117,614 |              |

|                                     |           |     |        |       |       |        |              |
|-------------------------------------|-----------|-----|--------|-------|-------|--------|--------------|
| <b>Number of objects identified</b> | Depressed | 54  | 15,570 | 4,407 | 2,133 | 252    | <b>0,034</b> |
|                                     | Solos     | 200 | 13,980 | 4,991 | 2,291 | 93,103 |              |

| Tabla 7b. Comparison of means between depressed individuals and “solos and depressed” groups in women.                                                                                |                     |        |        |                    |        |                    |              |
|---------------------------------------------------------------------------------------------------------------------------------------------------------------------------------------|---------------------|--------|--------|--------------------|--------|--------------------|--------------|
|                                                                                                                                                                                       | Groups              | Number | Median | standard deviation | t      | Degrees of freedom | P-value      |
| <b>Health status</b>                                                                                                                                                                  | Depressed           | 52     | 3,650  | 0,738              | 2,666  | 158,00             | <b>0,008</b> |
|                                                                                                                                                                                       | Solos and depressed | 108    | 3,310  | 0,791              | 2,731  | 107,36             |              |
| Heart attack                                                                                                                                                                          | Depressed           | 54     | 0,060  | 0,231              | 0,568  | 162,00             | 0,571        |
|                                                                                                                                                                                       | Solos and depressed | 110    | 0,040  | 0,188              | 0,530  | 88,47              |              |
| Anxiety                                                                                                                                                                               | Depressed           | 54     | 0,350  | 0,482              | -1,360 | 162,00             | 0,171        |
|                                                                                                                                                                                       | Solos and depressed | 110    | 0,460  | 0,501              | -1,378 | 109,18             |              |
| <b>Osteoporosis</b>                                                                                                                                                                   | Depressed           | 54     | 0,110  | 0,317              | -2,489 | 162,00             | <b>0,006</b> |
|                                                                                                                                                                                       | Solos and depressed | 110    | 0,280  | 0,452              | -2,799 | 142,47             |              |
| <b>Chronic back pain</b>                                                                                                                                                              | Depressed           | 54     | 0,220  | 0,420              | -2,278 | 162,00             | <b>0,018</b> |
|                                                                                                                                                                                       | Solos and depressed | 110    | 0,400  | 0,492              | -2,405 | 121,74             |              |
| Urinary tract problems (prostate. bladder)                                                                                                                                            | Depressed           | 54     | 0,060  | 0,231              | -1,695 | 162,00             | 0,053        |
|                                                                                                                                                                                       | Solos and depressed | 110    | 0,150  | 0,354              | -1,948 | 149,18             |              |
| <b>During the last 4 weeks. to what extent has any type of pain made it difficult for you to do your usual work (paid work and domestic or care work) or your leisure activities?</b> | Depressed           | 54     | 1,780  | 1,176              | -2,122 | 162,00             | <b>0,025</b> |
|                                                                                                                                                                                       | Solos and depressed | 110    | 2,250  | 1,430              | -2,267 | 125,64             |              |
| Headache                                                                                                                                                                              | Depressed           | 11     | 1,270  | 2,533              | -0,628 | 50,00              | 0,533        |
|                                                                                                                                                                                       | Solos and depressed | 41     | 1,850  | 2,771              | -0,662 | 17,01              |              |

|                                                                                                |                     |    |       |       |        |        |              |
|------------------------------------------------------------------------------------------------|---------------------|----|-------|-------|--------|--------|--------------|
| <b>Feet pain</b>                                                                               | Depressed           | 9  | 0,000 | 0,000 | -1,711 | 48,00  | <b>0,001</b> |
|                                                                                                | Solos and depressed | 41 | 1,590 | 2,757 | -3,683 | 40,00  |              |
| Eosinophils (x1000/mm3)                                                                        | Depressed           | 51 | 0,159 | 0,126 | 1,163  | 147,00 | 0,247        |
|                                                                                                | Solos and depressed | 98 | 0,137 | 0,100 | 1,083  | 83,68  |              |
| Monocyte percentage                                                                            | Depressed           | 37 | 6,849 | 1,223 | 0,918  | 107,00 | 0,361        |
|                                                                                                | Solos and depressed | 72 | 6,624 | 1,206 | 0,914  | 71,87  |              |
| Level of satisfaction with your life in general                                                | Depressed           | 37 | 7,050 | 1,224 | 1,703  | 131,00 | 0,091        |
|                                                                                                | Solos and depressed | 96 | 6,570 | 1,541 | 1,885  | 81,86  |              |
| <b>Level of satisfaction with his health</b>                                                   | Depressed           | 44 | 6,300 | 1,250 | 2,525  | 138,00 | <b>0,005</b> |
|                                                                                                | Solos and depressed | 96 | 5,560 | 1,728 | 2,840  | 112,33 |              |
| <b>Level of satisfaction with the achievements you are currently achieving in life</b>         | Depressed           | 36 | 7,170 | 1,134 | 3,227  | 127,00 | <b>0,000</b> |
|                                                                                                | Solos and depressed | 93 | 6,220 | 1,621 | 3,763  | 90,68  |              |
| <b>Level of satisfaction with personal relationships</b>                                       | Depressed           | 22 | 7,590 | 0,590 | 2,122  | 97,00  | <b>0,002</b> |
|                                                                                                | Solos and depressed | 77 | 6,960 | 1,352 | 3,166  | 80,89  |              |
| <b>Level of satisfaction with how safe and secure you feel</b>                                 | Depressed           | 28 | 7,360 | 0,780 | 2,416  | 107,00 | <b>0,001</b> |
|                                                                                                | Solos and depressed | 81 | 6,580 | 1,635 | 3,321  | 96,29  |              |
| <b>Level of satisfaction with their feeling of belonging to a community or group of people</b> | Depressed           | 32 | 7,250 | 0,950 | 2,148  | 120,00 | <b>0,006</b> |
|                                                                                                | Solos and depressed | 90 | 6,560 | 1,736 | 2,795  | 99,44  |              |
| <b>Number of diseases</b>                                                                      | Depressed           | 53 | 4,434 | 2,275 | -2,686 | 157,00 | <b>0,008</b> |

|                                                              |                     |     |       |        |        |        |              |
|--------------------------------------------------------------|---------------------|-----|-------|--------|--------|--------|--------------|
|                                                              | Solos and depressed | 106 | 5,557 | 2,582  | -2,802 | 116,63 |              |
| <b>Orientation</b>                                           | Depressed           | 54  | 9,890 | 0,317  | 2,159  | 162,00 | <b>0,007</b> |
|                                                              | Solos and depressed | 110 | 9,660 | 0,733  | 2,742  | 160,11 |              |
| <b>Attention and calculation</b>                             | Depressed           | 54  | 4,800 | 0,491  | 1,863  | 162,00 | <b>0,038</b> |
|                                                              | Solos and depressed | 110 | 4,600 | 0,693  | 2,089  | 141,65 |              |
| <b>3 Words Memory</b>                                        | Depressed           | 54  | 2,690 | 0,577  | 1,934  | 162,00 | <b>0,038</b> |
|                                                              | Solos and depressed | 110 | 2,460 | 0,738  | 2,101  | 131,15 |              |
| Reading                                                      | Depressed           | 54  | 1,000 | 0,000  | 0,700  | 162,00 | 0,485        |
|                                                              | Solos and depressed | 110 | 0,990 | 0,095  | 1,000  | 109,00 |              |
| <b>Global cognitive function</b>                             | Depressed           | 54  | ##### | 1,017  | 2,865  | 162,00 | <b>0,001</b> |
|                                                              | Solos and depressed | 110 | ##### | 1,624  | 3,332  | 152,51 |              |
| How many minutes of nap do you usually sleep each day?       | Depressed           | 54  | ##### | 25,574 | 0,716  | 162,00 | 0,475        |
|                                                              | Solos and depressed | 110 | ##### | 26,804 | 0,728  | 110,02 |              |
| How often do you wake up rested in the morning?              | Depressed           | 54  | 2,350 | 0,850  | 1,080  | 162,00 | 0,282        |
|                                                              | Solos and depressed | 110 | 2,200 | 0,844  | 1,078  | 104,73 |              |
| <b>Sleeping difficulties</b>                                 | Depressed           | 54  | 1,930 | 1,330  | -2,094 | 162,00 | <b>0,038</b> |
|                                                              | Solos and depressed | 110 | 2,410 | 1,416  | -2,140 | 111,63 |              |
| Waking up multiple times while sleeping                      | Depressed           | 54  | 2,690 | 1,464  | -0,407 | 162,00 | 0,684        |
|                                                              | Solos and depressed | 110 | 2,780 | 1,410  | -0,402 | 101,97 |              |
| How many hours a day do you spend moving while doing things? | Depressed           | 54  | 3,590 | 1,108  | 0,641  | 161,00 | 0,523        |
|                                                              | Solos and depressed | 109 | 3,470 | 1,199  | 0,658  | 113,56 |              |
| How many hours a day do you spend on your feet?              | Depressed           | 54  | 3,090 | 1,233  | 0,844  | 162,00 | 0,400        |

|                                                                 |                     |     |       |         |        |        |              |
|-----------------------------------------------------------------|---------------------|-----|-------|---------|--------|--------|--------------|
|                                                                 | Solos and depressed | 110 | 2,910 | 1,345   | 0,869  | 114,08 |              |
| Yale Movement Index                                             | Depressed           | 54  | ##### | 3,323   | 0,641  | 161,00 | 0,523        |
|                                                                 | Solos and depressed | 109 | ##### | 3,596   | 0,658  | 113,56 |              |
| Yale Standing Index                                             | Depressed           | 54  | 6,190 | 2,465   | 0,844  | 162,00 | 0,400        |
|                                                                 | Solos and depressed | 110 | 5,820 | 2,689   | 0,869  | 114,08 |              |
| <b>CO_task cancellation row has crossed out the last letter</b> | Depressed           | 54  | ##### | 4,325   | 1,697  | 160,00 | <b>0,046</b> |
|                                                                 | Solos and depressed | 108 | ##### | 4,704   | 1,746  | 114,40 |              |
| <b>CO_task cancellation last letter crossed out</b>             | Depressed           | 54  | ##### | 130,259 | 1,653  | 160,00 | <b>0,050</b> |
|                                                                 | Solos and depressed | 108 | ##### | 141,471 | 1,699  | 114,27 |              |
| <b>CO_task cancellation hits made</b>                           | Depressed           | 54  | ##### | 5,524   | 2,931  | 160,00 | <b>0,002</b> |
|                                                                 | Solos and depressed | 108 | ##### | 6,369   | 3,074  | 120,50 |              |
| CO_task cancellation commission errors made                     | Depressed           | 54  | 0,300 | 1,253   | -0,787 | 160,00 | 0,216        |
|                                                                 | Solos and depressed | 108 | 0,510 | 1,780   | -0,881 | 142,17 |              |
| <b>CO_task cancellation hits should be</b>                      | Depressed           | 54  | ##### | 11,042  | 1,862  | 160,00 | <b>0,032</b> |
|                                                                 | Solos and depressed | 108 | ##### | 11,614  | 1,894  | 111,02 |              |
| <b>Semantic fluency</b>                                         | Depressed           | 54  | ##### | 5,343   | 2,299  | 162,00 | <b>0,011</b> |
|                                                                 | Solos and depressed | 110 | ##### | 6,212   | 2,421  | 120,83 |              |
| <b>Phonological fluency</b>                                     | Depressed           | 54  | ##### | 3,830   | 2,362  | 162,00 | <b>0,004</b> |
|                                                                 | Solos and depressed | 110 | ##### | 5,893   | 2,717  | 149,56 |              |
| <b>Number of objects identified</b>                             | Depressed           | 54  | ##### | 4,407   | 2,490  | 162,00 | <b>0,007</b> |
|                                                                 | Solos and depressed | 110 | ##### | 5,033   | 2,606  | 118,90 |              |

Tabla 7c. Comparison of means between solos and “solos and depressed” groups in women.

|                                                                                                                                                                                | Groups              | Number | Median | standard deviation | t      | Degrees of freedom | P-value      |
|--------------------------------------------------------------------------------------------------------------------------------------------------------------------------------|---------------------|--------|--------|--------------------|--------|--------------------|--------------|
| <b>Health status</b>                                                                                                                                                           | Solos               | 194    | 3,670  | 0,730              | 4,036  | 300,000            | <b>0,000</b> |
|                                                                                                                                                                                | Solos and depressed | 108    | 3,310  | 0,791              | 3,945  | 206,826            |              |
| <b>Heart attack</b>                                                                                                                                                            | Solos               | 200    | 0,000  | 0,000              | -2,738 | 308,000            | <b>0,045</b> |
|                                                                                                                                                                                | Solos and depressed | 110    | 0,040  | 0,188              | -2,028 | 109,000            |              |
| <b>Anxiety</b>                                                                                                                                                                 | Solos               | 200    | 0,140  | 0,348              | -6,672 | 308,000            | <b>0,000</b> |
|                                                                                                                                                                                | Solos and depressed | 110    | 0,460  | 0,501              | -6,024 | 168,006            |              |
| Osteoporosis                                                                                                                                                                   | Solos               | 200    | 0,230  | 0,419              | -1,111 | 308,000            | 0,278        |
|                                                                                                                                                                                | Solos and depressed | 110    | 0,280  | 0,452              | -1,087 | 210,475            |              |
| <b>Chronic back pain</b>                                                                                                                                                       | Solos               | 200    | 0,250  | 0,434              | -2,774 | 308,000            | <b>0,008</b> |
|                                                                                                                                                                                | Solos and depressed | 110    | 0,400  | 0,492              | -2,675 | 201,987            |              |
| <b>Urinary tract problems (prostate. bladder)</b>                                                                                                                              | Solos               | 200    | 0,050  | 0,218              | -2,932 | 308,000            | <b>0,011</b> |
|                                                                                                                                                                                | Solos and depressed | 110    | 0,150  | 0,354              | -2,570 | 155,671            |              |
| During the last 4 weeks. to what extent has any type of pain made it difficult for you to do your usual work (paid work and domestic or care work) or your leisure activities? | Solos               | 200    | 1,960  | 1,269              | -1,900 | 308,000            | 0,058        |
|                                                                                                                                                                                | Solos and depressed | 110    | 2,250  | 1,430              | -1,835 | 203,053            |              |
| <b>Headache</b>                                                                                                                                                                | Solos               | 56     | 0,590  | 1,437              | -2,923 | 95,000             | <b>0,010</b> |
|                                                                                                                                                                                | Solos and depressed | 41     | 1,850  | 2,771              | -2,671 | 55,729             |              |
| Feet pain                                                                                                                                                                      | Solos               | 58     | 1,760  | 2,638              | 0,316  | 97,000             | 0,753        |
|                                                                                                                                                                                | Solos and depressed | 41     | 1,590  | 2,757              | 0,314  | 83,881             |              |
| <b>Eosinophils (x1000/mm3)</b>                                                                                                                                                 | Solos               | 194    | 0,177  | 0,161              | 2,227  | 290,000            | <b>0,027</b> |



|                                                                                                |                     |     |       |       |        |         |              |
|------------------------------------------------------------------------------------------------|---------------------|-----|-------|-------|--------|---------|--------------|
|                                                                                                | Solos and depressed | 98  | 0,137 | 0,100 | 2,580  | 277,826 |              |
| <b>Monocyte percentage</b>                                                                     | Solos               | 152 | 6,968 | 1,210 | 1,994  | 222,000 | <b>0,047</b> |
|                                                                                                | Solos and depressed | 72  | 6,624 | 1,206 | 1,996  | 139,915 |              |
| <b>Level of satisfaction with your life in general</b>                                         | Solos               | 161 | 7,070 | 0,997 | 3,168  | 255,000 | <b>0,005</b> |
|                                                                                                | Solos and depressed | 96  | 6,570 | 1,541 | 2,854  | 143,090 |              |
| <b>Level of satisfaction with his health</b>                                                   | Solos               | 168 | 6,580 | 1,382 | 5,230  | 262,000 | <b>0,000</b> |
|                                                                                                | Solos and depressed | 96  | 5,560 | 1,728 | 4,925  | 164,643 |              |
| <b>Level of satisfaction with the achievements you are currently achieving in life</b>         | Solos               | 159 | 6,850 | 1,318 | 3,380  | 250,000 | <b>0,002</b> |
|                                                                                                | Solos and depressed | 93  | 6,220 | 1,621 | 3,203  | 162,728 |              |
| <b>Level of satisfaction with personal relationships</b>                                       | Solos               | 139 | 7,380 | 0,855 | 2,795  | 214,000 | <b>0,015</b> |
|                                                                                                | Solos and depressed | 77  | 6,960 | 1,352 | 2,468  | 110,398 |              |
| <b>Level of satisfaction with how safe and secure you feel</b>                                 | Solos               | 147 | 7,270 | 1,087 | 3,786  | 226,000 | <b>0,001</b> |
|                                                                                                | Solos and depressed | 81  | 6,580 | 1,635 | 3,382  | 119,876 |              |
| <b>Level of satisfaction with their feeling of belonging to a community or group of people</b> | Solos               | 159 | 7,020 | 1,265 | 2,418  | 247,000 | <b>0,028</b> |
|                                                                                                | Solos and depressed | 90  | 6,560 | 1,736 | 2,220  | 143,271 |              |
| <b>Number of diseases</b>                                                                      | Solos               | 196 | 3,888 | 2,020 | -6,199 | 300,000 | <b>0,000</b> |

|                                                                     |                     |     |        |        |        |         |              |
|---------------------------------------------------------------------|---------------------|-----|--------|--------|--------|---------|--------------|
|                                                                     | Solos and depressed | 106 | 5,557  | 2,582  | -5,768 | 175,626 |              |
| Orientation                                                         | Solos               | 200 | 9,790  | 0,527  | 1,752  | 308,000 | 0,081        |
|                                                                     | Solos and depressed | 110 | 9,660  | 0,733  | 1,596  | 172,078 |              |
| Attention and calculation                                           | Solos               | 200 | 4,670  | 0,651  | 0,885  | 308,000 | 0,377        |
|                                                                     | Solos and depressed | 110 | 4,600  | 0,693  | 0,869  | 212,784 |              |
| 3 Words Memory                                                      | Solos               | 200 | 2,390  | 0,742  | -0,838 | 308,000 | 0,403        |
|                                                                     | Solos and depressed | 110 | 2,460  | 0,738  | -0,839 | 225,720 |              |
| Reading                                                             | Solos               | 200 | 0,980  | 0,140  | -0,728 | 308,000 | 0,467        |
|                                                                     | Solos and depressed | 110 | 0,990  | 0,095  | -0,811 | 294,505 |              |
| Global cognitive function                                           | Solos               | 200 | 28,440 | 1,593  | 0,375  | 308,000 | 0,708        |
|                                                                     | Solos and depressed | 110 | 28,360 | 1,624  | 0,373  | 221,029 |              |
| How many minutes of nap do you usually sleep each day?              | Solos               | 200 | 13,060 | 22,325 | -1,469 | 308,000 | 0,143        |
|                                                                     | Solos and depressed | 110 | 17,250 | 26,804 | -1,393 | 192,677 |              |
| <b>How often do you wake up rested in the morning?</b>              | Solos               | 198 | 2,530  | 0,703  | 3,674  | 306,000 | <b>0,001</b> |
|                                                                     | Solos and depressed | 110 | 2,200  | 0,844  | 3,488  | 193,339 |              |
| <b>Sleeping difficulties</b>                                        | Solos               | 199 | 2,000  | 1,159  | -2,741 | 307,000 | <b>0,010</b> |
|                                                                     | Solos and depressed | 110 | 2,410  | 1,416  | -2,588 | 190,306 |              |
| <b>Waking up multiple times while sleeping</b>                      | Solos               | 199 | 2,430  | 1,277  | -2,252 | 307,000 | <b>0,030</b> |
|                                                                     | Solos and depressed | 110 | 2,780  | 1,410  | -2,188 | 206,765 |              |
| <b>How many hours a day do you spend moving while doing things?</b> | Solos               | 199 | 3,870  | 1,054  | 3,081  | 306,000 | <b>0,003</b> |

|                                                                 |                     |     |         |         |        |         |              |
|-----------------------------------------------------------------|---------------------|-----|---------|---------|--------|---------|--------------|
|                                                                 | Solos and depressed | 109 | 3,470   | 1,199   | 2,968  | 199,327 |              |
| <b>How many hours a day do you spend on your feet?</b>          | Solos               | 199 | 3,420   | 1,240   | 3,345  | 307,000 | <b>0,001</b> |
|                                                                 | Solos and depressed | 110 | 2,910   | 1,345   | 3,268  | 209,992 |              |
| <b>Yale Movement Index</b>                                      | Solos               | 199 | 11,620  | 3,161   | 3,081  | 306,000 | <b>0,003</b> |
|                                                                 | Solos and depressed | 109 | 10,400  | 3,596   | 2,968  | 199,327 |              |
| <b>Yale Standing Index</b>                                      | Solos               | 199 | 6,830   | 2,480   | 3,345  | 307,000 | <b>0,001</b> |
|                                                                 | Solos and depressed | 110 | 5,820   | 2,689   | 3,268  | 209,992 |              |
| <b>CO_task cancellation row has crossed out the last letter</b> | Solos               | 198 | 11,190  | 4,650   | 1,760  | 304,000 | <b>0,040</b> |
|                                                                 | Solos and depressed | 108 | 10,200  | 4,704   | 1,754  | 217,861 |              |
| <b>CO_task cancellation last letter crossed out</b>             | Solos               | 198 | 322,450 | 140,123 | 1,755  | 304,000 | <b>0,040</b> |
|                                                                 | Solos and depressed | 108 | 292,930 | 141,471 | 1,750  | 218,214 |              |
| <b>CO_task cancellation hits made</b>                           | Solos               | 198 | 17,230  | 5,974   | 2,310  | 304,000 | <b>0,011</b> |
|                                                                 | Solos and depressed | 108 | 15,540  | 6,369   | 2,267  | 208,277 |              |
| <b>CO_task cancellation commission errors made</b>              | Solos               | 198 | 0,080   | 0,348   | -3,317 | 304,000 | <b>0,007</b> |
|                                                                 | Solos and depressed | 108 | 0,510   | 1,780   | -2,505 | 111,483 |              |
| <b>CO_task cancellation hits should be</b>                      | Solos               | 198 | 26,140  | 11,966  | 1,962  | 304,000 | <b>0,025</b> |
|                                                                 | Solos and depressed | 108 | 23,360  | 11,614  | 1,980  | 225,687 |              |
| Semantic fluency                                                | Solos               | 200 | 18,250  | 5,431   | 0,977  | 308,000 | 0,165        |
|                                                                 | Solos and depressed | 110 | 17,580  | 6,212   | 0,939  | 200,481 |              |

|                              |                     |     |        |       |       |         |       |
|------------------------------|---------------------|-----|--------|-------|-------|---------|-------|
| Phonological fluency         | Solos               | 200 | 11,080 | 5,457 | 0,931 | 308,000 | 0,176 |
|                              | Solos and depressed | 110 | 10,450 | 5,893 | 0,910 | 210,421 |       |
| Number of objects identified | Solos               | 200 | 13,980 | 4,991 | 0,685 | 308,000 | 0,247 |
|                              | Solos and depressed | 110 | 13,570 | 5,033 | 0,684 | 223,075 |       |
